# Supplementary material for: Correlations Between Trace Elements in Selected Locations of the Human Brain in Individuals with Alcohol Use Disorder
Source: PubMed Central journal article supplement (PMC7024425; doi:10.3390/molecules25020359), 2020-01-15
Supplement: molecules-25-00359-s001.pdf [file molecules-25-00359-s001.pdf]

# Supplementary Material

## Correlations Between Trace Elements in Selected Locations of the Human Brain in Individuals with Alcohol Use Disorder

Cezary Grochowski <sup>1,2,\*</sup>, Magdalena Szukała <sup>1</sup>, Jakub Litak <sup>2</sup>, Agnieszka Budny <sup>1</sup>, Jędrzej Proch <sup>3</sup>, Dariusz Majerek <sup>5</sup>, Eliza Blicharska <sup>4</sup> and Przemysław Niedzielski <sup>3</sup>

<sup>1</sup> Department of Anatomy, Medical University of Lublin, Jaczewskiego 4, 20-090 Lublin, Poland; medszukala@op.pl (M.S.); aguskabudny@gmail.com (A.B.)

<sup>2</sup> Department of Neurosurgery and Pediatric Neurosurgery, Medical University of Lublin, Jaczewskiego 8, 20-954 Lublin, Poland; jakub.litak@gmail.com

<sup>3</sup> Faculty of Chemistry, Department of Analytical Chemistry, Adam Mickiewicz University in Poznań, 89B Umultowska Street, 61-614 Poznań, Poland; jed.proch@gmail.com (J.P.); pnied@amu.edu.pl (P.N.)

<sup>4</sup> Department of Analytical Chemistry, Medical University of Lublin, Chodźki 4a, 20-093 Lublin, Poland; bayrena@o2.pl

<sup>5</sup> Department of Applied Mathematics, University of Technology, Nadbystrzycka 38D, 20-618 Lublin, Poland; d.majerek@pollub.pl

\* Correspondence: cezary.grochowski@o2.pl

**Table 1. Descriptive statistics. Statistics were calculated for each element by tested areas and groups (for data before logarithmic transformation).**

ACC - dorsal anterior Cingular cortex (Broadmann area no. 32),  
 CA - the head of the caudate nucleus,  
 FTH - frontal part of the thalamus,  
 HPC the foot of the hippocampus,  
 ILF – the inferior longitudinal fasciculus,  
 INS – the frontal part of the insula,  
 NAC - the nucleus accumbens,  
 PCG - post central gyrus (Broadmann area no. 1),  
 PFC – the frontal cortex (Broadmann area no. 11),  
 SLF - superior longitudinal fasciculus,  
**Total** - Average brain trace element concentrations (average of all presented concentrations),  
**K**- control group  
**AUD** – group with alcohol use disorder

| Element | Region | Group | min   | mean  | median | max   | sd    |
|---------|--------|-------|-------|-------|--------|-------|-------|
| Co      | ACC    | K     | 0.018 | 0.329 | 0.304  | 0.918 | 0.168 |
| Co      | ACC    | AUD   | 0.010 | 0.316 | 0.300  | 1.420 | 0.256 |
| Co      | CA     | K     | 0.010 | 0.171 | 0.168  | 0.410 | 0.073 |
| Co      | CA     | AUD   | 0.010 | 0.121 | 0.118  | 0.466 | 0.098 |
| Co      | FTH    | K     | 0.010 | 0.174 | 0.148  | 0.511 | 0.090 |
| Co      | FTH    | AUD   | 0.010 | 0.146 | 0.148  | 0.381 | 0.099 |
| Co      | HPC    | K     | 0.016 | 0.264 | 0.256  | 0.528 | 0.126 |
| Co      | HPC    | AUD   | 0.039 | 0.248 | 0.200  | 0.651 | 0.146 |
| Co      | ILF    | K     | 0.010 | 0.266 | 0.236  | 0.709 | 0.134 |
| Co      | ILF    | AUD   | 0.010 | 0.260 | 0.268  | 0.542 | 0.153 |
| Co      | INS    | K     | 0.106 | 0.272 | 0.227  | 0.638 | 0.140 |
| Co      | INS    | AUD   | 0.036 | 0.207 | 0.179  | 0.718 | 0.135 |
| Co      | NAC    | K     | 0.010 | 0.197 | 0.188  | 0.367 | 0.077 |
| Co      | NAC    | AUD   | 0.010 | 0.159 | 0.142  | 0.466 | 0.117 |
| Co      | PCG    | K     | 0.010 | 0.289 | 0.287  | 0.620 | 0.151 |
| Co      | PCG    | AUD   | 0.010 | 0.221 | 0.198  | 0.673 | 0.155 |
| Co      | PFC    | K     | 0.090 | 0.308 | 0.262  | 0.631 | 0.143 |
| Co      | PFC    | AUD   | 0.028 | 0.313 | 0.267  | 0.885 | 0.192 |
| Co      | SLF    | K     | 0.010 | 0.257 | 0.227  | 0.596 | 0.132 |

|    |       |     |       |       |       |       |       |
|----|-------|-----|-------|-------|-------|-------|-------|
| Co | SLF   | AUD | 0.010 | 0.244 | 0.238 | 0.501 | 0.155 |
| Co | Total | K   | 0.017 | 0.247 | 0.260 | 0.407 | 0.084 |
| Co | Total | AUD | 0.023 | 0.203 | 0.203 | 0.415 | 0.102 |

| Element | Region | Group | Min   | Mean  | Median | Max    | Sd    |
|---------|--------|-------|-------|-------|--------|--------|-------|
| Cr      | ACC    | K     | 0.029 | 0.606 | 0.139  | 5.203  | 1.315 |
| Cr      | ACC    | AUD   | 0.061 | 0.143 | 0.132  | 0.400  | 0.058 |
| Cr      | CA     | K     | 0.050 | 0.514 | 0.140  | 4.724  | 1.111 |
| Cr      | CA     | AUD   | 0.042 | 0.119 | 0.118  | 0.192  | 0.037 |
| Cr      | FTH    | K     | 0.092 | 0.789 | 0.164  | 7.234  | 1.825 |
| Cr      | FTH    | AUD   | 0.000 | 0.130 | 0.135  | 0.243  | 0.058 |
| Cr      | HPC    | K     | 0.052 | 0.579 | 0.135  | 5.679  | 1.301 |
| Cr      | HPC    | AUD   | 0.060 | 0.141 | 0.130  | 0.586  | 0.086 |
| Cr      | ILF    | K     | 0.084 | 0.575 | 0.221  | 3.918  | 1.036 |
| Cr      | ILF    | AUD   | 0.060 | 0.197 | 0.202  | 0.318  | 0.054 |
| Cr      | INS    | K     | 0.010 | 0.817 | 0.157  | 7.296  | 1.923 |
| Cr      | INS    | AUD   | 0.072 | 0.148 | 0.129  | 0.353  | 0.055 |
| Cr      | NAC    | K     | 0.012 | 0.626 | 0.167  | 5.377  | 1.332 |
| Cr      | NAC    | AUD   | 0.092 | 0.157 | 0.143  | 0.334  | 0.060 |
| Cr      | PCG    | K     | 0.010 | 0.575 | 0.151  | 4.634  | 1.234 |
| Cr      | PCG    | AUD   | 0.069 | 0.138 | 0.124  | 0.272  | 0.051 |
| Cr      | PFC    | K     | 0.018 | 0.167 | 0.141  | 0.557  | 0.105 |
| Cr      | PFC    | AUD   | 0.010 | 0.118 | 0.122  | 0.202  | 0.036 |
| Cr      | SLF    | K     | 0.087 | 1.104 | 0.235  | 21.606 | 3.425 |
| Cr      | SLF    | AUD   | 0.000 | 0.212 | 0.219  | 0.359  | 0.065 |
| Cr      | Total  | K     | 0.066 | 0.600 | 0.164  | 5.256  | 1.287 |
| Cr      | Total  | AUD   | 0.067 | 0.138 | 0.139  | 0.218  | 0.038 |

| Element | Region | Group | Min   | Mean   | Median | Max     | Sd     |
|---------|--------|-------|-------|--------|--------|---------|--------|
| Cu      | ACC    | K     | 1.653 | 13.092 | 4.693  | 95.011  | 24.910 |
| Cu      | ACC    | AUD   | 0.746 | 3.925  | 3.229  | 9.362   | 1.940  |
| Cu      | CA     | K     | 2.531 | 13.519 | 6.322  | 103.142 | 22.447 |

|    |       |     |       |        |       |         |         |
|----|-------|-----|-------|--------|-------|---------|---------|
| Cu | CA    | AUD | 1.845 | 5.179  | 4.758 | 12.065  | 2.502   |
| Cu | FTH   | K   | 1.599 | 26.471 | 4.367 | 289.239 | 67.504  |
| Cu | FTH   | AUD | 0.288 | 3.781  | 3.533 | 11.811  | 2.184   |
| Cu | HPC   | K   | 1.142 | 9.729  | 3.689 | 76.526  | 18.160  |
| Cu | HPC   | AUD | 0.000 | 3.143  | 2.658 | 12.941  | 2.178   |
| Cu | ILF   | K   | 1.514 | 11.648 | 4.589 | 81.397  | 21.082  |
| Cu | ILF   | AUD | 1.512 | 3.567  | 3.454 | 7.693   | 1.418   |
| Cu | INS   | K   | 1.695 | 36.698 | 5.200 | 552.858 | 104.206 |
| Cu | INS   | AUD | 0.964 | 4.366  | 3.738 | 10.043  | 2.072   |
| Cu | NAC   | K   | 3.169 | 16.063 | 7.520 | 115.411 | 26.347  |
| Cu | NAC   | AUD | 2.202 | 6.217  | 5.748 | 12.918  | 2.687   |
| Cu | PCG   | K   | 0.010 | 11.211 | 5.299 | 66.962  | 18.101  |
| Cu | PCG   | AUD | 1.238 | 4.345  | 3.947 | 12.033  | 2.241   |
| Cu | PFC   | K   | 1.282 | 4.497  | 4.258 | 18.619  | 2.506   |
| Cu | PFC   | AUD | 1.113 | 3.544  | 3.578 | 7.917   | 1.460   |
| Cu | SLF   | K   | 1.752 | 23.509 | 5.148 | 220.753 | 55.198  |
| Cu | SLF   | AUD | 0.000 | 3.840  | 3.494 | 8.320   | 1.598   |
| Cu | Total | K   | 1.805 | 13.326 | 5.091 | 108.462 | 25.019  |
| Cu | Total | AUD | 1.255 | 3.836  | 3.335 | 9.339   | 1.789   |

| Element | Region | Group | Min    | Mean    | Median  | Max      | Sd      |
|---------|--------|-------|--------|---------|---------|----------|---------|
| Fe      | ACC    | K     | 8.543  | 174.372 | 69.050  | 1394.160 | 334.061 |
| Fe      | ACC    | AUD   | 17.903 | 45.101  | 42.990  | 91.111   | 18.343  |
| Fe      | CA     | K     | 27.145 | 379.249 | 256.813 | 1751.535 | 426.725 |
| Fe      | CA     | AUD   | 21.784 | 172.798 | 137.523 | 402.695  | 107.643 |
| Fe      | FTH    | K     | 17.525 | 272.350 | 133.078 | 1990.494 | 432.241 |
| Fe      | FTH    | AUD   | 5.391  | 99.384  | 80.225  | 227.739  | 53.527  |
| Fe      | HPC    | K     | 8.623  | 215.959 | 77.805  | 1591.086 | 407.799 |
| Fe      | HPC    | AUD   | 11.395 | 59.139  | 58.949  | 186.287  | 31.417  |
| Fe      | ILF    | K     | 10.895 | 276.799 | 121.480 | 2020.169 | 482.923 |
| Fe      | ILF    | AUD   | 31.683 | 72.213  | 68.834  | 126.508  | 28.428  |
| Fe      | INS    | K     | 17.029 | 267.168 | 96.854  | 1913.870 | 504.777 |

|    |       |     |        |         |         |          |         |
|----|-------|-----|--------|---------|---------|----------|---------|
| Fe | INS   | AUD | 23.930 | 83.364  | 61.621  | 578.783  | 97.567  |
| Fe | NAC   | K   | 26.965 | 492.265 | 357.984 | 1836.781 | 437.194 |
| Fe | NAC   | AUD | 59.966 | 248.525 | 219.727 | 613.819  | 159.395 |
| Fe | PCG   | K   | 0.014  | 219.458 | 112.331 | 1461.148 | 354.355 |
| Fe | PCG   | AUD | 24.352 | 73.620  | 71.160  | 132.441  | 31.725  |
| Fe | PFC   | K   | 13.141 | 83.918  | 70.716  | 315.762  | 61.174  |
| Fe | PFC   | AUD | 18.574 | 54.715  | 44.424  | 195.749  | 32.033  |
| Fe | SLF   | K   | 8.990  | 266.169 | 99.085  | 2003.161 | 489.608 |
| Fe | SLF   | AUD | 31.150 | 62.791  | 54.289  | 121.335  | 25.464  |
| Fe | Total | K   | 19.264 | 248.008 | 135.620 | 1772.171 | 363.335 |
| Fe | Total | AUD | 16.466 | 88.655  | 71.498  | 191.182  | 47.095  |

| Element | Region | Group | Min   | Mean    | Median | Max      | Sd      |
|---------|--------|-------|-------|---------|--------|----------|---------|
| Mn      | ACC    | K     | 0.103 | 105.900 | 0.352  | 1118.100 | 302.234 |
| Mn      | ACC    | AUD   | 0.171 | 0.311   | 0.296  | 0.566    | 0.103   |
| Mn      | CA     | K     | 0.204 | 83.897  | 0.694  | 770.251  | 238.170 |
| Mn      | CA     | AUD   | 0.145 | 0.570   | 0.552  | 1.157    | 0.245   |
| Mn      | FTH    | K     | 0.150 | 93.691  | 0.577  | 1030.368 | 269.262 |
| Mn      | FTH    | AUD   | 0.030 | 0.494   | 0.479  | 0.959    | 0.204   |
| Mn      | HPC    | K     | 0.112 | 86.628  | 0.460  | 856.286  | 247.276 |
| Mn      | HPC    | AUD   | 0.214 | 0.412   | 0.384  | 1.169    | 0.176   |
| Mn      | ILF    | K     | 0.126 | 78.139  | 0.463  | 936.485  | 226.312 |
| Mn      | ILF    | AUD   | 0.195 | 0.457   | 0.439  | 1.288    | 0.217   |
| Mn      | INS    | K     | 0.124 | 70.545  | 0.371  | 743.097  | 200.783 |
| Mn      | INS    | AUD   | 0.118 | 0.427   | 0.304  | 1.970    | 0.390   |
| Mn      | NAC    | K     | 0.209 | 76.402  | 0.776  | 735.512  | 214.487 |
| Mn      | NAC    | AUD   | 0.265 | 0.692   | 0.642  | 1.593    | 0.370   |
| Mn      | PCG    | K     | 0.010 | 97.264  | 0.377  | 1139.303 | 287.188 |
| Mn      | PCG    | AUD   | 0.125 | 0.397   | 0.297  | 2.657    | 0.444   |
| Mn      | PFC    | K     | 0.075 | 0.461   | 0.314  | 2.757    | 0.510   |
| Mn      | PFC    | AUD   | 0.143 | 0.273   | 0.268  | 0.530    | 0.086   |
| Mn      | SLF    | K     | 0.169 | 98.705  | 0.593  | 1116.068 | 284.665 |

|    |       |     |       |        |       |         |         |
|----|-------|-----|-------|--------|-------|---------|---------|
| Mn | SLF   | AUD | 0.209 | 0.514  | 0.511 | 1.205   | 0.211   |
| Mn | Total | K   | 0.139 | 77.366 | 0.497 | 884.211 | 234.668 |
| Mn | Total | AUD | 0.167 | 0.413  | 0.377 | 0.883   | 0.172   |

| Element | Region | Group | Min   | Mean  | Median | Max    | Sd    |
|---------|--------|-------|-------|-------|--------|--------|-------|
| Se      | ACC    | K     | 0.038 | 3.225 | 0.635  | 14.437 | 5.331 |
| Se      | ACC    | AUD   | 0.000 | 0.510 | 0.426  | 1.485  | 0.371 |
| Se      | CA     | K     | 0.018 | 3.173 | 0.474  | 21.590 | 6.757 |
| Se      | CA     | AUD   | 0.010 | 0.418 | 0.427  | 1.101  | 0.255 |
| Se      | FTH    | K     | 0.000 | 2.374 | 0.508  | 18.356 | 5.279 |
| Se      | FTH    | AUD   | 0.029 | 0.442 | 0.334  | 1.712  | 0.359 |
| Se      | HPC    | K     | 0.043 | 2.793 | 0.478  | 20.355 | 5.747 |
| Se      | HPC    | AUD   | 0.017 | 0.477 | 0.432  | 1.413  | 0.354 |
| Se      | ILF    | K     | 0.013 | 1.771 | 0.428  | 10.836 | 3.289 |
| Se      | ILF    | AUD   | 0.031 | 0.577 | 0.604  | 1.233  | 0.327 |
| Se      | INS    | K     | 0.021 | 3.325 | 0.504  | 19.184 | 6.400 |
| Se      | INS    | AUD   | 0.027 | 0.465 | 0.334  | 1.772  | 0.415 |
| Se      | NAC    | K     | 0.020 | 1.946 | 0.408  | 12.019 | 3.798 |
| Se      | NAC    | AUD   | 0.069 | 0.459 | 0.418  | 1.130  | 0.262 |
| Se      | PCG    | K     | 0.043 | 3.395 | 0.492  | 17.406 | 5.975 |
| Se      | PCG    | AUD   | 0.027 | 0.537 | 0.444  | 1.351  | 0.403 |
| Se      | PFC    | K     | 0.040 | 0.551 | 0.489  | 1.613  | 0.428 |
| Se      | PFC    | AUD   | 0.024 | 0.428 | 0.401  | 1.046  | 0.313 |
| Se      | SLF    | K     | 0.021 | 3.054 | 0.614  | 21.265 | 5.942 |
| Se      | SLF    | AUD   | 0.028 | 0.473 | 0.444  | 0.917  | 0.284 |
| Se      | Total  | K     | 0.077 | 1.772 | 0.263  | 18.378 | 4.392 |
| Se      | Total  | AUD   | 0.090 | 0.323 | 0.281  | 0.810  | 0.179 |

| Element | Region | Group | Min   | Mean   | Median | Max    | Sd    |
|---------|--------|-------|-------|--------|--------|--------|-------|
| Zn      | ACC    | K     | 6.848 | 18.192 | 18.970 | 24.789 | 4.652 |
| Zn      | ACC    | AUD   | 4.206 | 16.370 | 14.741 | 31.496 | 5.908 |
| Zn      | CA     | K     | 7.171 | 18.763 | 20.008 | 25.158 | 4.714 |

---

|    |       |     |       |        |        |         |        |
|----|-------|-----|-------|--------|--------|---------|--------|
| Zn | CA    | AUD | 6.308 | 15.464 | 15.121 | 26.732  | 5.700  |
| Zn | FTH   | K   | 6.503 | 17.735 | 18.613 | 26.621  | 4.402  |
| Zn | FTH   | AUD | 1.191 | 16.189 | 14.947 | 79.978  | 12.207 |
| Zn | HPC   | K   | 7.616 | 21.957 | 22.992 | 36.935  | 5.755  |
| Zn | HPC   | AUD | 5.080 | 23.636 | 17.823 | 208.636 | 33.741 |
| Zn | ILF   | K   | 4.376 | 14.044 | 14.988 | 20.100  | 3.983  |
| Zn | ILF   | AUD | 4.739 | 11.661 | 11.969 | 20.047  | 3.837  |
| Zn | INS   | K   | 8.923 | 19.649 | 20.278 | 31.350  | 5.019  |
| Zn | INS   | AUD | 8.325 | 27.992 | 17.436 | 379.986 | 64.405 |
| Zn | NAC   | K   | 6.516 | 22.334 | 21.135 | 119.424 | 16.814 |
| Zn | NAC   | AUD | 7.320 | 16.548 | 16.066 | 29.138  | 6.059  |
| Zn | PCG   | K   | 5.264 | 18.924 | 16.687 | 101.000 | 14.313 |
| Zn | PCG   | AUD | 4.598 | 13.811 | 12.839 | 25.550  | 5.192  |
| Zn | PFC   | K   | 7.246 | 24.217 | 18.558 | 120.045 | 22.130 |
| Zn | PFC   | AUD | 4.959 | 15.388 | 15.865 | 26.876  | 5.030  |
| Zn | SLF   | K   | 3.899 | 11.764 | 12.377 | 20.246  | 3.038  |
| Zn | SLF   | AUD | 4.030 | 11.869 | 9.606  | 66.044  | 9.694  |
| Zn | Total | K   | 3.138 | 17.834 | 18.721 | 31.001  | 5.117  |
| Zn | Total | AUD | 3.460 | 15.205 | 13.971 | 43.383  | 7.784  |

---

2. Table S2. Results of certified reference materials analysis

|           | CRM CS-M-1          |                     |       | CRM NCSDC           |                     |       | CRM S-1             |                     |       | CRM 2709            |                     |       | CRM 405             |                     |       | CRM 667             |                     |       |
|-----------|---------------------|---------------------|-------|---------------------|---------------------|-------|---------------------|---------------------|-------|---------------------|---------------------|-------|---------------------|---------------------|-------|---------------------|---------------------|-------|
|           | certified           | reference           | value | certified           | reference           | value | certified           | reference           | value | certified           | reference           | value | certified           | reference           | value | certified           | reference           | value |
|           | mg kg <sup>-1</sup> | mg kg <sup>-1</sup> | %     | mg kg <sup>-1</sup> | mg kg <sup>-1</sup> | %     | mg kg <sup>-1</sup> | mg kg <sup>-1</sup> | %     | mg kg <sup>-1</sup> | mg kg <sup>-1</sup> | %     | mg kg <sup>-1</sup> | mg kg <sup>-1</sup> | %     | mg kg <sup>-1</sup> | mg kg <sup>-1</sup> | %     |
| <b>Co</b> | x                   | 0,11                | x     | 0,41                | 0,38                | 93    | 3,9                 | 3,4                 | 87    | 12,8                | 12,6                | 98    | 13,7                | 14,0                | 102   | 23                  | 21,0                | 91    |
| <b>Cr</b> | x                   | 0,48                | x     | 2,6                 | 2,1                 | 81    | 38                  | 40                  | 105   | 130                 | 143                 | 110   | 84                  | 75                  | 89    | 178                 | 169                 | 95    |
| <b>Cu</b> | x                   | 7,1                 | x     | 6,6                 | 6,1                 | 92    | 6,3                 | 5,9                 | 94    | x                   | 21                  | x     | 47,7                | 43                  | 90    | 60                  | 62                  | 103   |
| <b>Fe</b> | x                   | 104                 | x     | 1070                | 943                 | 88    | 9880                | 9553                | 97    | 33600               | 29459               | 88    | 37400               | 32655               | 87    | 44800               | 40890               | 91    |
| <b>Mn</b> | x                   | 12                  | x     | 61                  | 56                  | 92    | 266                 | 286                 | 107   | 529                 | 461                 | 87    | 495                 | 398                 | 80    | 920                 | 723                 | 79    |
| <b>Se</b> | 1,37                | 1,5                 | 106   | x                   | 0,21                | x     | x                   | <0,01               | x     | 1,5                 | 1,20                | 80    | 0,44                | 0,50                | 114   | 1,59                | 1,5                 | 94    |
| <b>Zn</b> | 60,9                | 62                  | 102   | 55                  | 58                  | 105   | 35                  | 38                  | 109   | 103                 | 98                  | 95    | 279                 | 235                 | 84    | 175                 | 167                 | 95    |
